# Supplementary material
Source: MDPI journal article supplement (https://www.mdpi.com/1424-2818/12/4/159)
Supplement: s1 [file s1]

**Table S1.** PCR primer sequences and steps used in this study.

| **Primer Name** | **Sequences (5’ to 3’)** | **Step** |
| --- | --- | --- |
| COI | 5`-GGTCAACAATCATAAAGATATTGG-3` | (94℃ for 3 min) + 35 × [(94℃ for 30 sec) → (50℃ for 30 sec) → (72℃ for 2 min)] + (72℃ for 10 min) |
| 5`-TAAACTTCAGGGTGACCAAAAAATC-3` |
| 16S-rRNA | 5`-CGCCTGTTTATCAAAAACAT-3` | (94℃ for 3 min) + 35 × [(94℃ for 30 sec) → (55℃ for 30 sec) → (72℃ for 1 min)] + (72℃ for 10 min) |
| 5`-CTCCGGTTTGAACTCAGATCA-3` |
| 28S-rRNA | 5`-GACCCGTCTTGAAACACGGA-3` | (94℃ for 3 min) + 35 × [(94℃ for 30 sec) → (59℃ for 30 sec) → (72℃ for 1 min)] + (72℃ for 10 min) |
| 5`-TCGGAAGGAACCAGCTACTA-3` |

**Table S2.** Haplotype distribution of Chinese *Acanthochiton rubrolineatus* inferred from 238 *COI* and *16S -rRNA* sequences. Each column represents the sampling location and the rows refer to the 92 haplotypes.

|  | **Population** | **DL** | **YT** | **WH** | **QD** | **LYG** | **ZS** | **YH** | **XM** |
| --- | --- | --- | --- | --- | --- | --- | --- | --- | --- |
| H1 | 1 | 1 |  |  |  |  |  |  |  |
| H2 | 4 | 3 |  | 1 |  |  |  |  |  |
| H3 | 9 | 3 | 3 | 2 |  | 1 |  |  |  |
| H4 | 1 | 1 |  |  |  |  |  |  |  |
| H5 | 2 | 2 |  |  |  |  |  |  |  |
| H6 | 58 | 5 | 12 | 9 | 14 | 18 |  |  |  |
| H7 | 1 | 1 |  |  |  |  |  |  |  |
| H8 | 3 | 1 | 1 | 1 |  |  |  |  |  |
| H9 | 1 | 1 |  |  |  |  |  |  |  |
| H10 | 2 | 2 |  |  |  |  |  |  |  |
| H11 | 10 | 1 | 2 | 5 | 1 | 1 |  |  |  |
| H12 | 1 | 1 |  |  |  |  |  |  |  |
| H13 | 1 | 1 |  |  |  |  |  |  |  |
| H14 | 1 | 1 |  |  |  |  |  |  |  |
| H15 | 1 | 1 |  |  |  |  |  |  |  |
| H16 | 2 | 2 |  |  |  |  |  |  |  |
| H17 | 1 | 1 |  |  |  |  |  |  |  |
| H18 | 1 | 1 |  |  |  |  |  |  |  |
| H19 | 1 | 1 |  |  |  |  |  |  |  |
| H20 | 2 |  |  | 1 |  | 1 |  |  |  |
| H21 | 1 |  |  |  |  | 1 |  |  |  |
| H22 | 1 |  |  |  |  | 1 |  |  |  |
| H23 | 1 |  |  |  |  | 1 |  |  |  |
| H24 | 2 |  |  |  | 1 | 1 |  |  |  |
| H25 | 1 |  |  |  |  | 1 |  |  |  |
| H26 | 1 |  |  |  |  | 1 |  |  |  |
| H27 | 1 |  |  |  |  | 1 |  |  |  |
| H28 | 1 |  |  |  |  | 1 |  |  |  |
| H29 | 1 |  |  |  |  | 1 |  |  |  |
| H30 | 2 |  |  |  | 2 |  |  |  |  |
| H31 | 1 |  |  |  | 1 |  |  |  |  |
| H32 | 2 |  | 1 |  | 1 |  |  |  |  |
| H33 | 1 |  |  |  | 1 |  |  |  |  |
| H34 | 2 |  | 1 |  | 1 |  |  |  |  |
| H35 | 1 |  |  |  | 1 |  |  |  |  |
| H36 | 1 |  |  |  | 1 |  |  |  |  |
| H37 | 1 |  |  |  | 1 |  |  |  |  |
| H38 | 1 |  |  |  | 1 |  |  |  |  |
| H39 | 1 |  |  |  | 1 |  |  |  |  |
| H40 | 1 |  |  |  | 1 |  |  |  |  |
| H41 | 2 |  | 1 |  | 1 |  |  |  |  |
| H42 | 1 |  |  |  | 1 |  |  |  |  |
| H43 | 2 |  |  | 2 |  |  |  |  |  |
| H44 | 1 |  |  | 1 |  |  |  |  |  |
| H45 | 2 |  |  | 2 |  |  |  |  |  |
| H46 | 1 |  |  | 1 |  |  |  |  |  |
| H47 | 1 |  |  | 1 |  |  |  |  |  |
| H48 | 1 |  |  | 1 |  |  |  |  |  |
| H49 | 1 |  |  | 1 |  |  |  |  |  |
| H50 | 1 |  |  | 1 |  |  |  |  |  |
| H51 | 2 |  | 1 | 1 |  |  |  |  |  |
| H52 | 1 |  |  |  |  |  |  |  | 1 |
| H53 | 1 |  |  |  |  |  |  |  | 1 |
| H54 | 53 |  |  |  |  |  | 19 | 19 | 15 |
| H55 | 1 |  |  |  |  |  |  |  | 1 |
| H56 | 1 |  |  |  |  |  |  |  | 1 |
| H57 | 1 |  |  |  |  |  |  |  | 1 |
| H58 | 2 |  |  |  |  |  |  |  | 2 |
| H59 | 1 |  |  |  |  |  |  |  | 1 |
| H60 | 1 |  |  |  |  |  |  |  | 1 |
| H61 | 1 |  |  |  |  |  |  |  | 1 |
| H62 | 1 |  |  |  |  |  |  |  | 1 |
| H63 | 1 |  |  |  |  |  |  |  | 1 |
| H64 | 1 |  |  |  |  |  |  |  | 1 |
| H65 | 1 |  |  |  |  |  |  | 1 |  |
| H66 | 1 |  |  |  |  |  |  | 1 |  |
| H67 | 1 |  |  |  |  |  |  | 1 |  |
| H68 | 1 |  |  |  |  |  |  | 1 |  |
| H69 | 1 |  |  |  |  |  |  | 1 |  |
| H70 | 2 |  |  |  |  |  | 1 | 1 |  |
| H71 | 1 |  |  |  |  |  |  | 1 |  |
| H72 | 1 |  |  |  |  |  |  | 1 |  |
| H73 | 1 |  |  |  |  |  |  | 1 |  |
| H74 | 1 |  |  |  |  |  |  | 1 |  |
| H75 | 1 |  |  |  |  |  |  | 1 |  |
| H76 | 1 |  | 1 |  |  |  |  |  |  |
| H77 | 1 |  | 1 |  |  |  |  |  |  |
| H78 | 2 |  | 2 |  |  |  |  |  |  |
| H79 | 1 |  | 1 |  |  |  |  |  |  |
| H80 | 1 |  | 1 |  |  |  |  |  |  |
| H81 | 1 |  | 1 |  |  |  |  |  |  |
| H82 | 1 |  | 1 |  |  |  |  |  |  |
| H83 | 1 |  |  |  |  |  | 1 |  |  |
| H84 | 1 |  |  |  |  |  | 1 |  |  |
| H85 | 1 |  |  |  |  |  | 1 |  |  |
| H86 | 1 |  |  |  |  |  | 1 |  |  |
| H87 | 1 |  |  |  |  |  | 1 |  |  |
| H88 | 1 |  |  |  |  |  | 1 |  |  |
| H89 | 1 |  |  |  |  |  | 1 |  |  |
| H90 | 1 |  |  |  |  |  | 1 |  |  |
| H91 | 1 |  |  |  |  |  | 1 |  |  |
| H92 | 1 |  |  |  |  |  | 1 |  |  |

**Table S3.** Molecular variance (AMOVA) analysis in based on *COI* and *16S-rRNA* sequences.

| **Source of Variation** | **d.f.** | **Sum of Squares** | **Variance Components** | **Percentage of Variation** |
| --- | --- | --- | --- | --- |
| Among populations | 7 | 3507.189 | 16.35844 Va | 53.19 |
| Within populations | 230 | 3311.483 | 14.39775 Vb | 46.81 |
| Total | 237 | 6818.672 | 30.75619 |  |
| Among groups | 1 | 3319.912 | 29.79585 Va | 66.78 |
| Within groups | 236 | 3498.761 | 14.82526 Vb | 33.22 |
| Total | 237 | 6818.672 | 44.62111 |  |

**Table S4.** Genetic diversity parameters based on 235 *28S-rRNA* sequences.

| **Locality** | **h** | **S** | **Hd** | **π** | **Tajima’ *D*** | **Fu’s *Fs*** |
| --- | --- | --- | --- | --- | --- | --- |
| DL | 4 | 3 | 0.660 | 0.00316 | 0.23284 | -0.040 |
| YT | 4 | 4 | 0.614 | 0.00444 | 0.41383 | 0.812 |
| WH | 5 | 5 | 0.701 | 0.00544 | 0.28755 | 0.198 |
| QD | 6 | 5 | 0.694 | 0.00616 | -0.23686 | -0.222 |
| LYG | 4 | 3 | 0.614 | 0.00427 | 1.14728 | 0.707 |
| ZS | 9 | 17 | 0.834 | 0.01975 | 0.70449 | 1.299 |
| YH | 8 | 10 | 0.834 | 0.01809 | 2.80350** | 1.771* |
| XM | 9 | 14 | 0.735 | 0.01575 | 0.51313 | 0.280 |
| Northern group | 8 | 5 | 0.650 | 0.00323 | -0.72552 | -2.296 |
| Southern group | 12 | 20 | 0.827 | 0.01853 | 0.64936 | 1.781 |
| ALL | 20 | 23 | 0.830 | 0.01350 | -0.41631 | -2.095* |

Number of haplotype (h), number of segregating sites (S), haplotype diversity (Hd), nucleotide diversity (π). *Significant at level (p<0.05), **Significant at level (p<0.02), ***Significant at level (p<0.001).

**Table S5.** Haplotype distribution of Chinese *Acanthochiton rubrolineatus* inferred from 235 28S-rRNA sequences. Each column represents the sampling location and the rows refer to the 20 haplotypes.

|  | **population** | **DL** | **YT** | **WH** | **QD** | **LYG** | **ZS** | **YH** | **XM** |
| --- | --- | --- | --- | --- | --- | --- | --- | --- | --- |
| S1 | 7 | 2 |  | 1 | 3 | 1 |  |  |  |
| S2 | 73 | 13 | 19 | 10 | 13 | 18 |  |  |  |
| S3 | 5 | 3 |  |  | 2 |  |  |  |  |
| S4 | 52 | 12 | 10 | 12 | 7 | 11 |  |  |  |
| S5 | 1 |  |  |  | 1 |  |  |  |  |
| S6 | 6 |  |  | 2 | 4 |  |  |  |  |
| S7 | 23 |  |  |  |  |  | 4 | 5 | 14 |
| S8 | 2 |  |  | 2 |  |  |  |  |  |
| S9 | 19 |  |  |  |  |  | 9 | 6 | 4 |
| S10 | 17 |  |  |  |  |  | 6 | 9 | 2 |
| S11 | 3 |  |  |  |  |  |  | 1 | 2 |
| S12 | 14 |  |  |  |  |  | 7 | 5 | 2 |
| S13 | 4 |  |  |  |  |  | 1 | 2 | 1 |
| S14 | 3 |  |  |  |  |  | 1 | 1 | 1 |
| S15 | 1 |  |  |  |  |  |  |  | 1 |
| S16 | 1 |  |  |  |  |  |  |  | 1 |
| S17 | 1 |  |  |  |  |  |  | 1 |  |
| S18 | 1 |  | 1 |  |  |  |  |  |  |
| S19 | 1 |  |  |  |  |  | 1 |  |  |
| S20 | 1 |  |  |  |  |  | 1 |  |  |
